# Supplementary material
Source: publisher figshare collection journal article supplement (https://frontiersin.figshare.com/ndownloader/files/22254456)
Supplement: Supplementary file 1 [file 22254456]

## *Supplementary Material*

### 1 Supplementary Figures and Tables

#### 1.1 Supplementary Figures

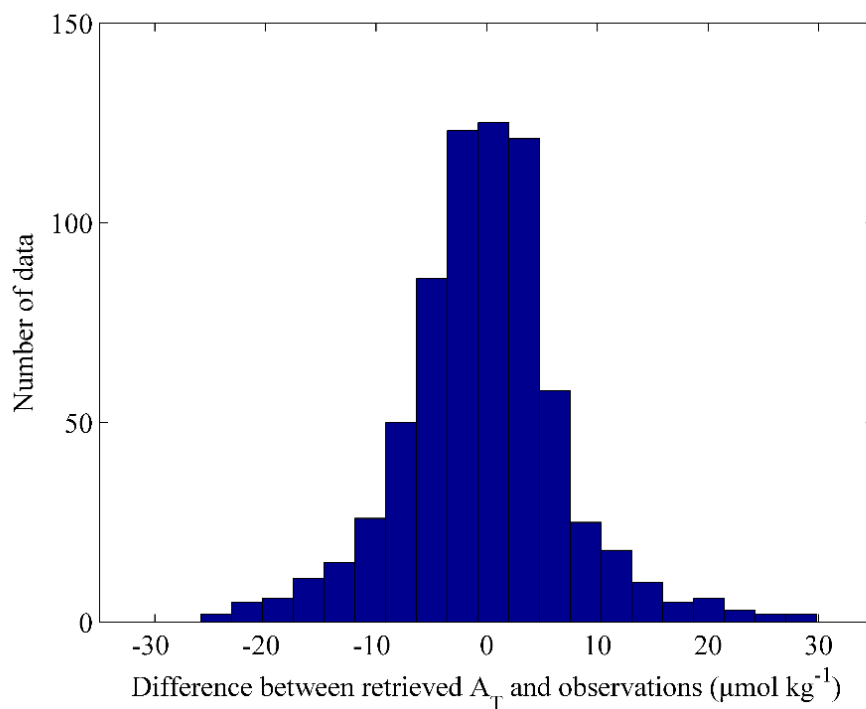

**Supplementary Figure 1.** Normal distribution of the differences between total alkalinity estimated by the ANN model minus the observations for all cruises data.

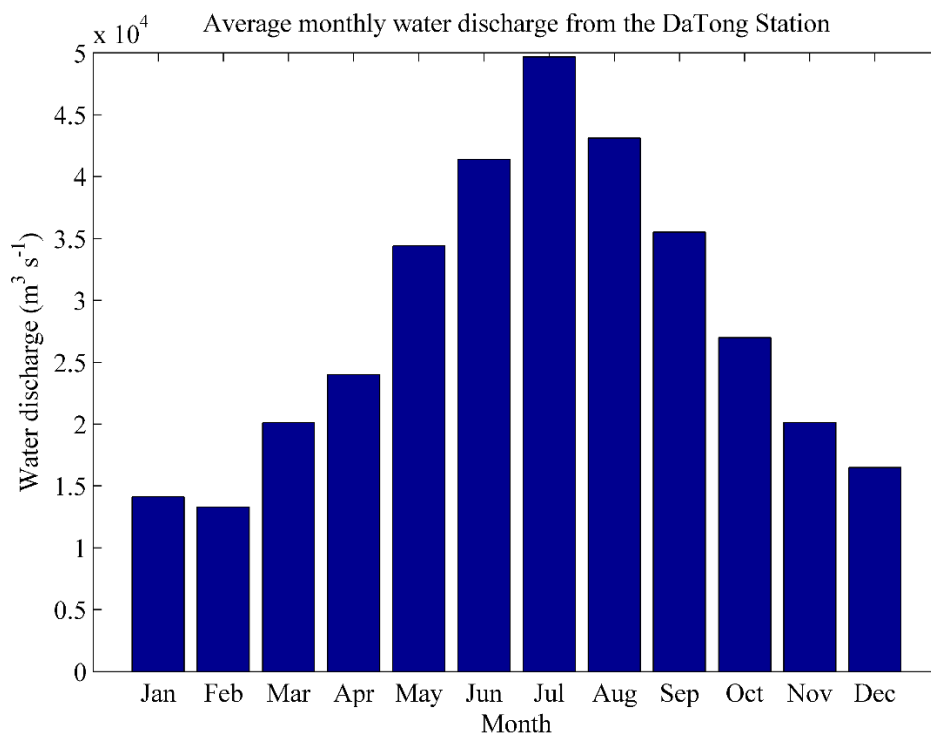

**Supplementary Figure 2.** Average monthly water discharge of the Changjiang River (Datong station, data derived from the Hydrological Information Center of China, <http://www.hydroinfo.gov.cn/>). The blue bar displays the long-term (2002–2017) average values.

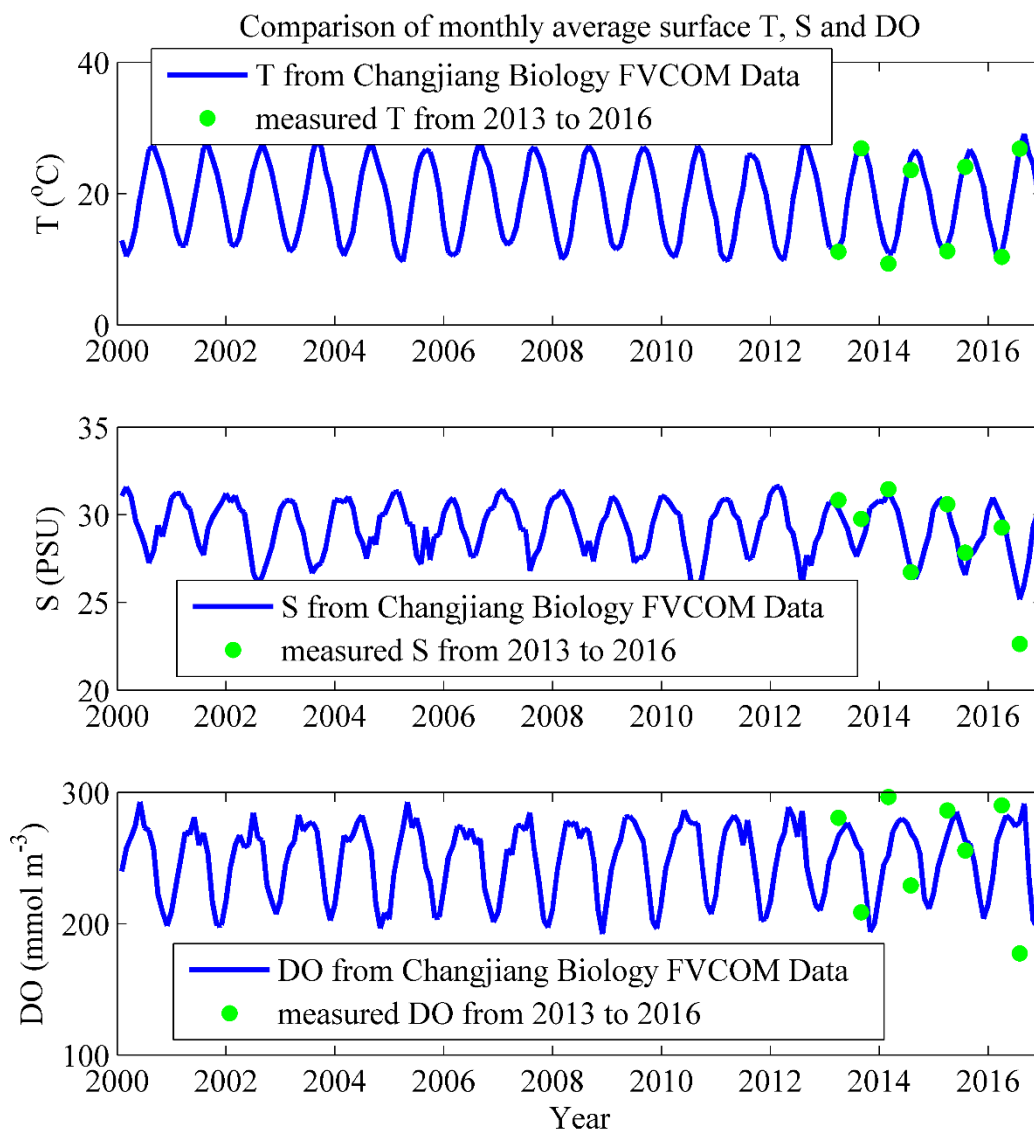

**Supplementary Figure 3.** Comparison of monthly average surface temperature, salinity and dissolved oxygen on the ECS shelf. Blue line represents simulated value from Changjiang Biology FVCOM Data; green point represents measured value for 8 cruises from 2013 to 2016.

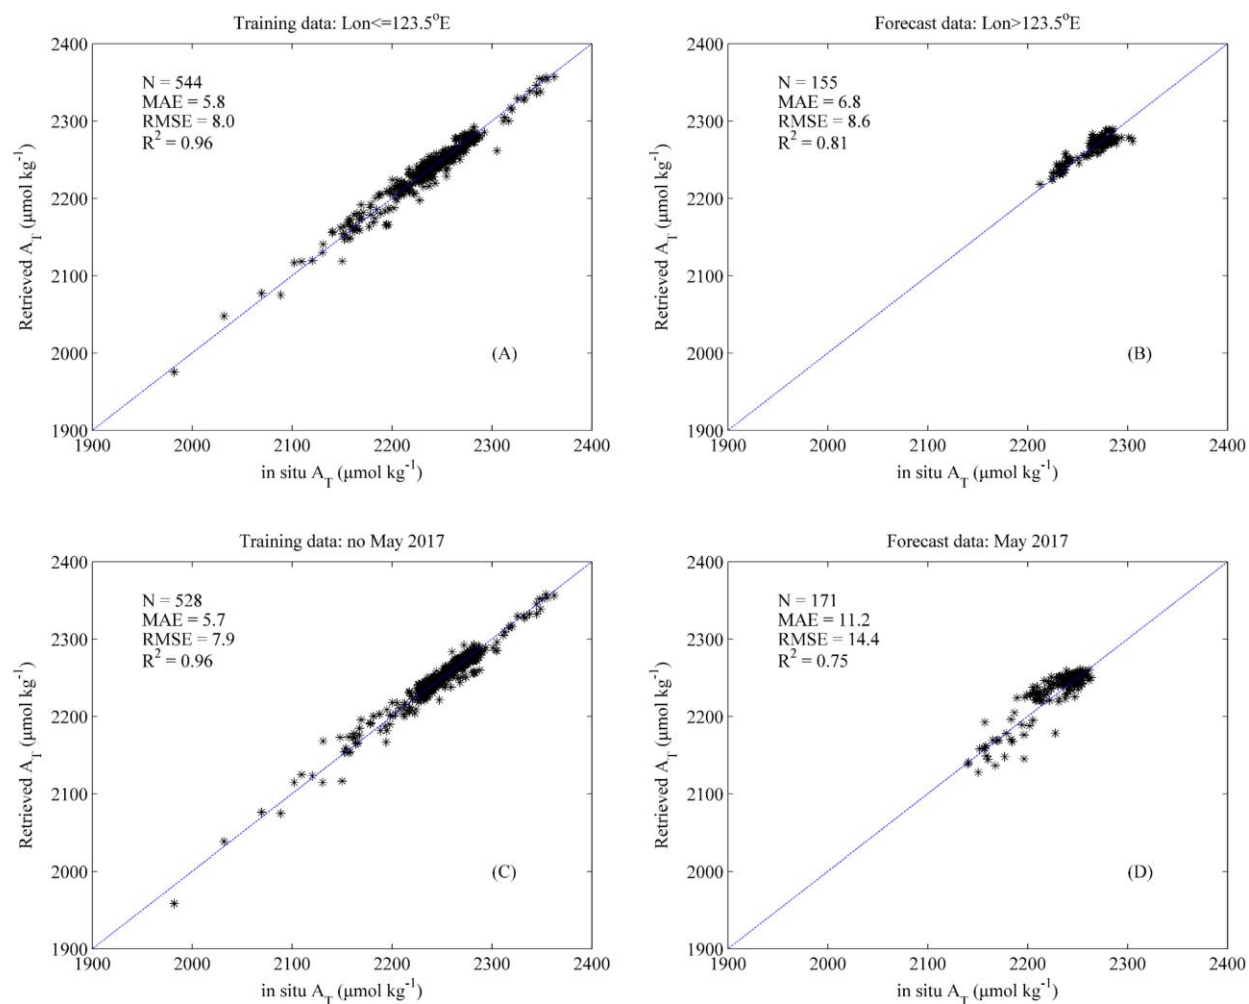

**Supplementary Figure 4.** Performance of model extrapolation for longitude ( $>123.5^\circ\text{E}$ ) and month (May 2017). (A) Training data for longitude  $\leq 123.5^\circ\text{E}$ ; (B) Forecast data for longitude  $> 123.5^\circ\text{E}$ ; (C) Training data for 4 cruises without May 2017; (D) Forecast data for May 2017 cruise. The 1:1 line is shown in each plot as visual reference.  $N$  represents the number of data points. Three statistics are the mean absolute error (MAE), the root mean squared error (RMSE), and the coefficient of determination ( $R^2$ ).
